# Supplementary material for: Culturing and transcriptome profiling of progenitor-like colonies derived from adult mouse pancreas
Source: PubMed Central journal article supplement (PMC5530554; doi:10.1186/s13287-017-0626-y), 2017-07-26
Supplement: 13287_2017_626_MOESM2_ESM.pdf [file 13287_2017_626_MOESM2_ESM.pdf]

**A**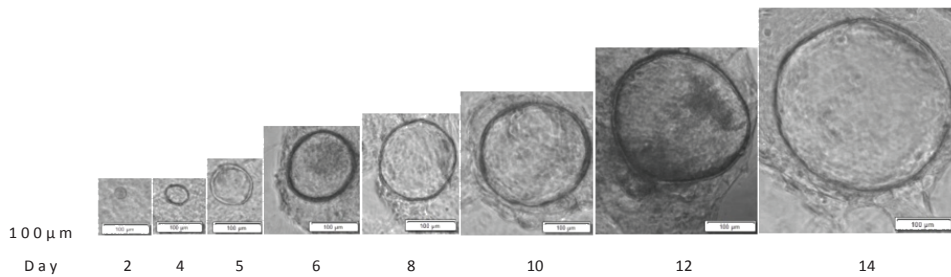**B**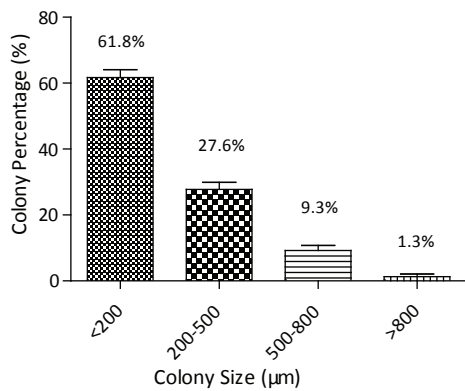**C**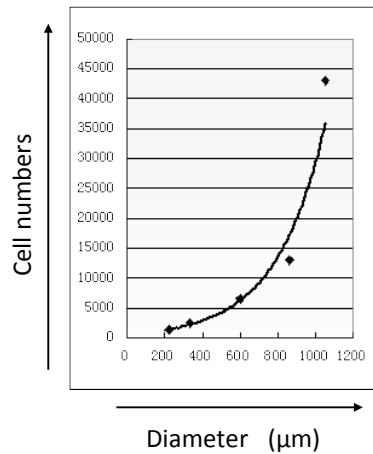**D**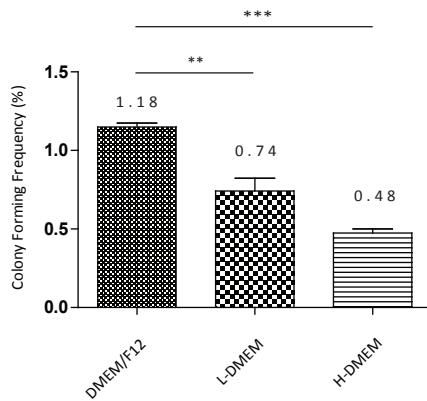**E**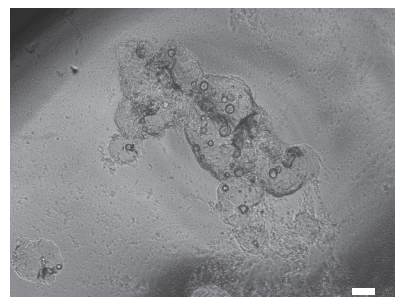200  $\mu\text{m}$
