# Supplementary material for: Culturing and transcriptome profiling of progenitor-like colonies derived from adult mouse pancreas
Source: PubMed Central journal article supplement (PMC5530554; doi:10.1186/s13287-017-0626-y), 2017-07-26

A

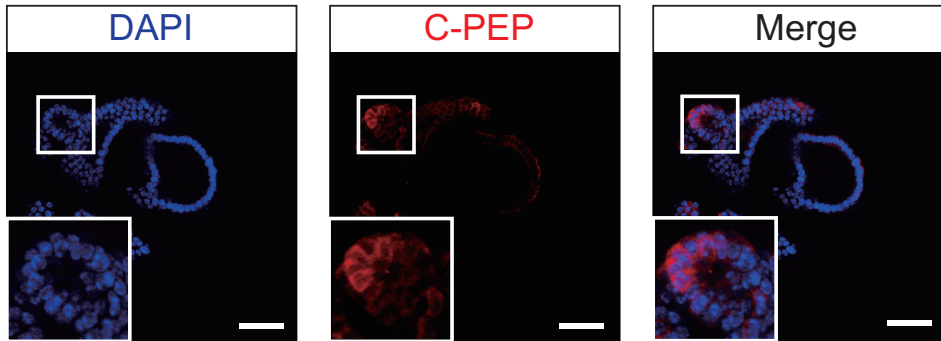

Supplement: 13287_2017_626_MOESM4_ESM.pdf [file 13287_2017_626_MOESM4_ESM.pdf]
